# Supplementary material for: Antibiotic susceptibility, cytotoxicity, and protease activity of viridans group streptococci causing endophthalmitis
Source: PubMed Central journal article supplement (PMC6303072; doi:10.1371/journal.pone.0209849), 2018-12-21
Supplement: pone.0209849.s001.pdf [file pone.0209849.s001.pdf]

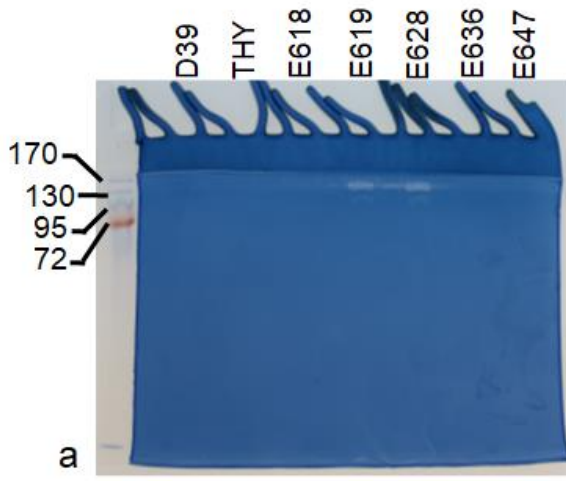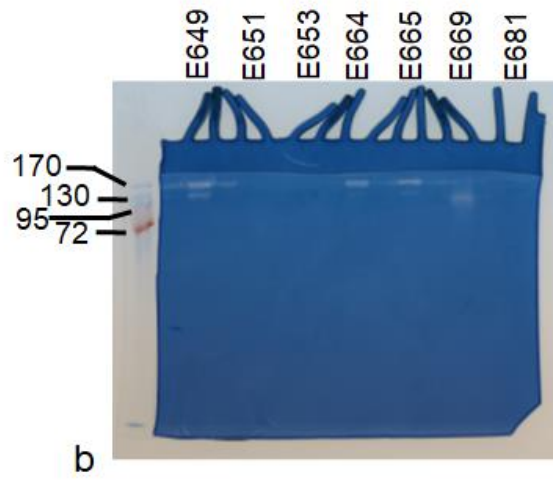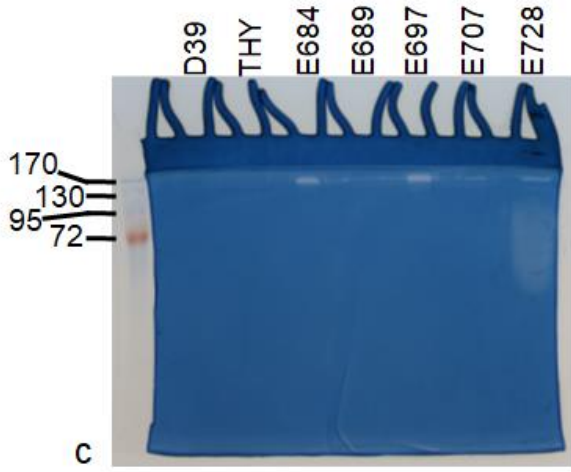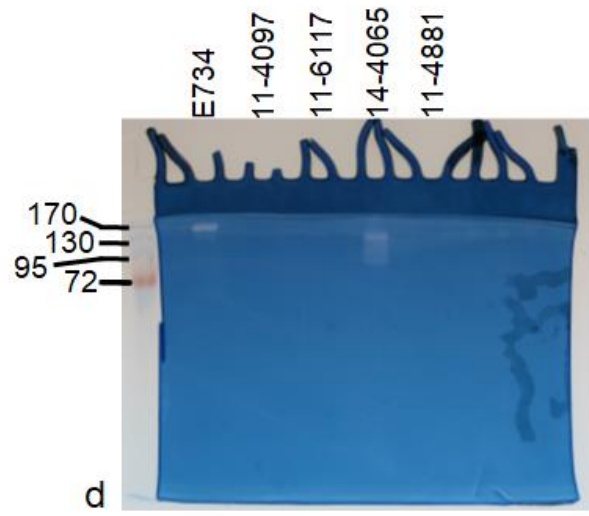

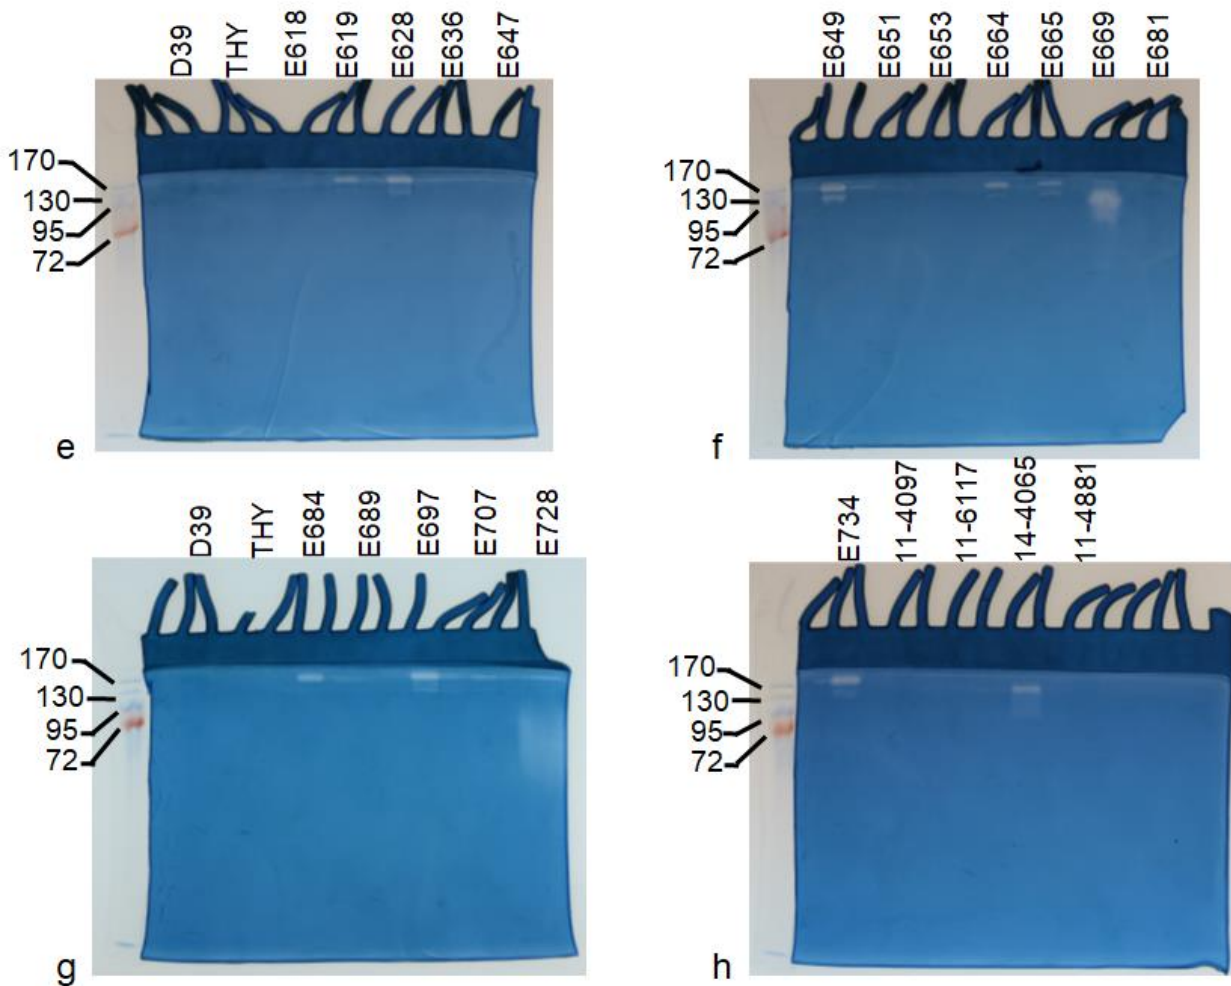

**S1 Fig. Full-length zymograms from 2 sets of biological replicates.** Zymograms a-d were electrophoresed simultaneously with one batch of concentrated supernatants. Zymograms e-h were electrophoresed simultaneously with a separate batch of concentrated supernatants (independent biological replicates). Pre-stained molecular mass standards, to the left of each gel, were cut from each gel after electrophoresis but prior to staining to maintain visibility. Photographs of the gels were taken with a Canon Rebel XSi camera while the gels were placed on a standard white light box. Photographs were saved to an HP SurfacePro 4 tablet. Photographs of zymograms e-h

were cropped, resized while maintaining proportions, and placed together for final manuscript form (Fig 3) with Corel PaintShop Pro X9 and Microsoft Powerpoint software. Cropping and resizing were the only modifications to the photographs.
